# Supplementary material for: Short-wavelength sensitive opsin (SWS1) as a new marker for vertebrate phylogenetics
Source: PubMed Central journal article supplement (PMC1664589; doi:10.1186/1471-2148-6-97), 2006-11-15
Supplement: 1471-2148-6-97-S1.pdf [file 1471-2148-6-97-S1.pdf]

|                       |               |             |             |             |             |             |             |            |       |
|-----------------------|---------------|-------------|-------------|-------------|-------------|-------------|-------------|------------|-------|
| pouched_lamprey       | -----MSGDE    | EFYLFKNISK  | VGPWDGQPF-  | HIAPKWAFYL  | QAAFMGFVFI  | CGTPLNAIVL  | VVTIKYKKLR  | [ 70]      |       |
| goldfish              | -----MDA      | WTYQFGNLSK  | ISPFEGPQY-  | HLAPKWAFYL  | QAAFMGFVFF  | VGTPLNIAIVL | FVTMKYKKLR  | [ 70]      |       |
| carp                  | -----MDA      | WTYQFGNLSK  | VSPFEGPQY-  | HLAPKWAFYL  | QAAFMGFVFL  | VGTPMNAIVL  | FVTMKYKKLR  | [ 70]      |       |
| Malawi_eye-biter      | -----GK       | HFHLYENISK  | ISPFEGPQY-  | YLAPVWAFYL  | QAAFMGFVFF  | AGTPLNFIVL  | VATMKYKKLR  | [ 70]      |       |
| zebrafish             | -----MDA      | WAVQFGNASK  | VSPFEGPQY-  | HIAPKWAFYL  | QAAFMGFVFI  | VGTPMNGIVL  | FVTMKYKKLR  | [ 70]      |       |
| Atlantic_halibut      | -----MMGK     | HFHLYENVSN  | VSPFDGPQY-  | YLAPQWAFHL  | QTIFMGSVLF  | AGTPLNFIVL  | LVTLYKYYKLR | [ 70]      |       |
| Fuellerborns_cichlid  | -----MGK      | HFHLYENISK  | ISPFEGPQY-  | YLAPVWAFYL  | QAAFMGFVFF  | AGTPLNFIVL  | VATMKYKKLR  | [ 70]      |       |
| Nile_tilapia          | -----MGK      | YFHLYENISK  | VSPFEGPQY-  | YLAPTWAFYL  | QAAFMGFVLF  | AGTPLNFVVL  | VATMKYKKLR  | [ 70]      |       |
| killifish             | -----MGK      | HFHLYENISK  | VDPFEGPQY-  | YLAPVWAFHL  | QALFMGFVFF  | TGTPLNFLVVL | LATAKYKKLR  | [ 70]      |       |
| zebra_mbuna           | -----MGK      | HFHLYENISK  | ISPFEGPQY-  | YLAPVWAFYL  | QAAFMGFVFF  | AGTPLNFIVL  | VATMKYKKLR  | [ 70]      |       |
| pink_salmon           | -----MGK      | DFHLYENISK  | VSPFEGPQY-  | HLAPKWAFYL  | QTAFMGFVFF  | AGTPLNFIVL  | VATMKYKKLR  | [ 70]      |       |
| chum_salmon           | -----MGK      | DFHLYENISK  | VSPFEGPQY-  | HLAPIWAFYL  | QTAFMGFVFF  | AGTPLNFIIIL | VVTVKYKKLR  | [ 70]      |       |
| coho_salmon           | -----MGK      | NFHLYENISK  | VSPFEGPQY-  | HLAPIWAFYL  | QTAFMGFVFF  | AGTPLNLIIL  | VVTVKYKKLR  | [ 70]      |       |
| rainbow_trout         | -----MGK      | DFHLYENISK  | VSPFEGPQY-  | HLAPIWAFYL  | QTAFMGFVFF  | AGTPLNFIIIL | VVTVKYKKLR  | [ 70]      |       |
| sockeye_salmon        | -----MGK      | DFHLYENISK  | VSPFEGPQY-  | HLAPIWAFYL  | QTAFMGFVFF  | AGTPLNFIIIL | VVTVKYKKLR  | [ 70]      |       |
| chinook_salmon        | -----MGK      | DFHLYENISK  | VSPFEGPQY-  | HLAPIWAFYL  | QTAFMGFVFF  | AGTPLNFIIIL | VVTVKYKKLR  | [ 70]      |       |
| Atlantic_salmon       | -----MGK      | DFHLYENISK  | ISPFEGPQY-  | HLASMWAFYL  | QAAFMGFVFF  | AGTPLNFIIIL | VVTVKYKKLR  | [ 70]      |       |
| smelt                 | -----MGK      | QFHLYENVSK  | IGPFEGPQY-  | YLAPVWVFFYL | QAAFMGFVFF  | VGTPLNFIIL  | MVTIKYKKLR  | [ 70]      |       |
| howler_monkey         | ---MSKMSEEE   | EFYLFKNISS  | VGPWDGPQY-  | HIAPVWAFYL  | QAAFMGIVFL  | AGLPLNAMVL  | VATVRYKRLR  | [ 70]      |       |
| cow                   | --MSKMSEEE    | EFYLFKNISL  | VGPWDGPQY-  | HLAPVWAFHL  | QAVFMGFVFF  | VGTPLNATVVL | VATLRYKRLR  | [ 70]      |       |
| dog                   | --MSKMSEEE    | EFYLFKNISL  | VGPWDGPQY-  | HIAPVWAFHL  | QAVFMGFVFF  | AGTPLNGTVL  | VATLRYKRLR  | [ 70]      |       |
| marmoset              | --MSKMSEEE    | EFYLFKNISS  | VGPWDGQPYP  | HIAPSWAYYL  | QAAFMGIVFL  | IGLPLNFMVL  | VATVRYKRLR  | [ 70]      |       |
| capuchin_monkey       | ---MSKMSEEE   | EFYLFKNISS  | VGPWDGPQY-  | HIAPVWAFYL  | QAAFMGIVFL  | VGLPLNAMVL  | VATVRYKRLR  | [ 70]      |       |
| chum_salmon           | ---MSEEE      | EFYLFKNASS  | VSPFDGPQY-  | HVAPVWAFRL  | QAAFMGIVFC  | IGTPLNGLVVL | VATLLYKRLR  | [ 70]      |       |
| brown_lemur           | --MCKMSGEE    | EFYLFKNLSP  | VGPWDGPQY-  | HIAPVWAFYL  | QAAFMGIVFF  | AGAPLNVML   | VATLRYKRLR  | [ 70]      |       |
| gorilla               | ---MRKMSEEE   | EFYLFKNISP  | VGPWDGPQY-  | HIAPVWAFYL  | QAAFMGIVFL  | IGFPLNAMVL  | VATLRYKRLR  | [ 70]      |       |
| human                 | ---MRKMSEEE   | EFYLFKNISS  | VGPWDGPQY-  | HIAPVWAFYL  | QAAFMGIVFL  | IGFPLNAMVL  | VATLRYKRLR  | [ 70]      |       |
| bandicoot             | -----MSGDE    | EFYLFKNISK  | VGPWDGPQY-  | HIAPAWAFHC  | QTVFMGFVFF  | AGTPLNAIVL  | IATLRYKRLR  | [ 70]      |       |
| African_elephant      | ---MIKMSGEE   | EFYLFKNISS  | VGPWGGPQY-  | HIGPVWAFHL  | QAAFMAFVFF  | VGTPLNALVVL | VATLRYKRLR  | [ 70]      |       |
| wallaby               | -----MSGDE    | EFYLFKNISS  | VGPWDGPQY-  | HIAPAWAFHC  | QTVFMGFVFF  | AGTPLNAVVL  | IATFRYKRLR  | [ 70]      |       |
| macaque               | ---MRKMSEEE   | EFYLFKNLSS  | VKPWDGPQY-  | HIAPVWAFYL  | QAAFMGIVFL  | AGFPLNAMVL  | VATVRYKRLR  | [ 70]      |       |
| house_mouse           | -----MSGED    | DFYLFQNISS  | VGPWDGPQY-  | HLAPVWAFRL  | QAAFMGFVFF  | VGTPLNATVVL | VATLRYKRLR  | [ 70]      |       |
| talapoin              | ---MRKMSEEE   | EFYLFKNISS  | VKPWDGPQY-  | HIPVWVAYYL  | QAAFMGIVFL  | AGFPLNAMVL  | VATVRYKRLR  | [ 70]      |       |
| Djungarian_hamster    | -----VFF      | -----       | -----       | -----       | -----       | AGVPLNATVVL | VATLRYKRLR  | [ 70]      |       |
| chimpanzee            | ---MRKMSEEE   | EFYLFKNISS  | VGPWDGPQY-  | HIAPVWAFYL  | QAAFMGIVFL  | IGFPLNAMVL  | VATLRYKRLR  | [ 70]      |       |
| Norway_rat            | -----MSGED    | DFYLFQNISS  | VGPWDGPQY-  | HIAPVWAFHL  | QAAFMGFVFF  | AGTPLNATVVL | VATLRYKRLR  | [ 70]      |       |
| squirrel_monkey       | --MSKMPEEE    | EFYLFKNISS  | VGPWDGPQY-  | HIAPVWAFYL  | QAAFMGIVFL  | AGLPLNSMVL  | VATVRYKRLR  | [ 70]      |       |
| quokka                | -----MSGDE    | EFYLFKNISS  | VGPWDGPQY-  | HIAPAWAFHC  | QTVFMGFVFF  | AGTPLN?VVL  | IATFRYKRLR  | [ 70]      |       |
| dunnart               | -----MSGDE    | EFYLFKNISL  | VGPWDGPQY-  | HLAPAWAFHF  | QTAFMGFVFF  | AGTSLNGVVL  | IATLRYKRLR  | [ 70]      |       |
| pig                   | MSKMPEEEEEE   | EFYLFKNISL  | VGPWDGPQY-  | HLAPVWVFFHL | QAAFMGFVFL  | VGTPLNATVVL | VATLRYKRLR  | [ 70]      |       |
| western_tarsier       | -----MSEEE    | EFYLFKNISS  | VGPWDGPQH-  | HLAPVWVFFHL | QAAFMGVFFS  | VGIPLNTMVL  | VATLRYKRLR  | [ 70]      |       |
| Caribbean_manatee     | ---MSKMSEEE   | EFYLFKNISS  | VGPWDGPQY-  | HIAPVWAFRL  | QAAFMGFVFF  | AGTPLNAMVL  | VATLRYKRLR  | [ 70]      |       |
| green_anole           | -----MSGQE    | DFYLFENISS  | VGPWDGPQY-  | HIAPMWAFFYF | QTAFMGFVFF  | AGTPLNAIIL  | IATVRYKRLR  | [ 70]      |       |
| tokay_gecko           | -----MSGEE    | DFYLFYANISS | VGPFDGPQY-  | HIAPMWAFFYF | QTAFMGFVFF  | VGTPLNATVVL | FAIVRYKRLR  | [ 70]      |       |
| day_gecko             | -----MSGEE    | DFYLFYANISS | VGPFDGPQY-  | HIAPMWAFFYF | QTAFMGFVFF  | AGTPLNGIIL  | IAIVRYKRLR  | [ 70]      |       |
| pigeon                | -----MSGDE    | EFYLFKNISS  | VGPWDGPQY-  | HIAPVWAFYL  | QTAFMGFVFL  | VGTPFNATVVL | VVTIKYKKLR  | [ 70]      |       |
| yellow-crowned_bishop | -----AFYL     | -----       | -----       | -----       | -----       | QTIFMGLVFL  | AGTPLNAIVL  | IATVRYKRLR | [ 70] |
| red_bishop            | -----AFYL     | -----       | -----       | -----       | -----       | QTIFMGLVFL  | AGTPLNAIVL  | IATVRYKRLR | [ 70] |
| chicken               | -----MSSDD    | DFYLFYANISS | VGPWDGPQY-  | HIAPVWAFYL  | QTAFMGIVFA  | VGTPLNATVVL | VATVRYKRLR  | [ 70]      |       |
| Siberian_rubythroat   | -----FYL      | -----       | -----       | -----       | -----       | QTIFMGLVFL  | AGTPLNAIVL  | IATVRYKRLR | [ 70] |
| bluethroat            | -----?FYL     | -----       | -----       | -----       | -----       | QTIFMGLVFL  | AGTPLNAIVL  | IATVRYKRLR | [ 70] |
| budgerigar            | -----MSGEE    | EFYLFKNISS  | VGPWDGPQY-  | HIAPVWAFYL  | QTAFMGFVFL  | VGTPLNATVVL | VATVRYKRLR  | [ 70]      |       |
| blue_tit              | -----WAFYL    | -----       | -----       | -----       | -----       | QTIFMGLVFL  | AGTPLNAIVL  | IATVRYKRLR | [ 70] |
| great_tit             | -----AFYL     | -----       | -----       | -----       | -----       | QTIFMGLVFL  | AGTPLNAIVL  | IATVRYKRLR | [ 70] |
| marsh_tit             | -----AFYL     | -----       | -----       | -----       | -----       | QTIFMGLVFL  | AGTPLNAIVL  | IATVRYKRLR | [ 70] |
| Humboldts_penguin     | -----PWDGPQY- | -----       | -----       | -----       | -----       | QTAFMGFVFL  | VGTPFNATVVL | VATVRYKRLR | [ 70] |
| common_canary         | -----MDEE     | EFYLFKNQSS  | VGPWDGPQY-  | HIAPMWAFFYL | QTIFMGLVFL  | AGTPLNAIVL  | IATVRYKRLR  | [ 70]      |       |
| zebra_finch           | -----MDEE     | EFYLFKNQSS  | VGPWDGPQY-  | HIAPMWAFFYL | QTIFMGLVFL  | AGTPLNAIVL  | IATVRYKRLR  | [ 70]      |       |
| tiger_salamander      | -----MLEEE    | EFYLFKNISK  | VGPWDGPQY-  | HIAPWTFYF   | QTAFMGFVFF  | VGTPLNATVVL | IATVRYKRLR  | [ 70]      |       |
| firebelly_newt        | -----MVGDD    | DFYLFKNISK  | VGPWDGPQY-  | HIAPWTFYF   | QTAFMGFVFF  | VGTPLNATVVL | IATVRYKRLR  | [ 70]      |       |
| American_bullfrog     | -----MLGDE    | DFYLFKNVSD  | IRPWDGPQY-  | HIAPWTFYF   | QAI FMGVVFI | IGTPLNATVVL | IATVRYKRLR  | [ 70]      |       |
| African_Clawed_frog   | -----MLEEE    | DFYLFKNVSN  | VSPFDGPQY-  | HIAPWTFYF   | QAI FMGMVFL | IGTPLNATVVL | IATVRYKRLR  | [ 70]      |       |
|                       |               |             |             |             |             |             |             |            |       |
| pouched_lamprey       | QPLNYILVNI    | SAAGLVFCLF  | SISTVIVASV  | QGYFFLGPTI  | CALEAFFGSL  | AGLVTG-WSL  | AFLAERYIV   | [140]      |       |
| goldfish              | QPLNYILVNI    | SLGGFIFDTF  | SVSQVFFSAL  | RGYFFFGYTL  | CAMEAAMGSI  | AGLVTG-WSL  | AVLAFERYVV  | [140]      |       |
| carp                  | QPLNYILVNI    | SLGGFIFDTF  | SVSQVFFSAL  | RGYFFFGHTM  | CAMESAMGSI  | AGLVTG-WSL  | AVLAFERYVV  | [140]      |       |
| Malawi_eye-biter      | VPLNFILVNI    | SFSGFIFDTF  | SVSQVFFLASM | RGYFFLGHTL  | CALESVAVGSV | AGLVTA-WSL  | AVLSFERYLV  | [140]      |       |
| zebrafish             | QPLNYILVNI    | SLAGFIFDTF  | SVSQVFFCAA  | RGYFFLGHTL  | CAMEAAMGSI  | AGLVTG-WSL  | AVLAFERYVV  | [140]      |       |
| Atlantic_halibut      | VPLNYILVNI    | CFAGLIFVVF  | SVSQVFFVSTM | RGYFFLGHTL  | CALESAMGSI  | AGLVTS-WSL  | AVLSFERYLV  | [140]      |       |
| Fuellerborns_cichlid  | VPLNFILVNI    | SFSGFIFVTF  | SVSQVFFLASM | RGYFFLGHTL  | CALESVAVGSV | AGLVTA-WSL  | AVLSFERYLV  | [140]      |       |
| Nile_tilapia          | VPLNFILVNI    | SFSGFIFVTF  | SVSQVFFLASM | RGYFFLGHTL  | CALEAAVGA   | AGLVTA-WSL  | AVLSFERYLV  | [140]      |       |

|                       |            |             |             |             |            |            |            |       |
|-----------------------|------------|-------------|-------------|-------------|------------|------------|------------|-------|
| killifish             | APLNYILVNI | SFAGFIFVTF  | SVSQVVFVSSA | RGYYFLGYTL  | CALEAAMGAV | AGLVTG-WSL | AVLSFERYLV | [140] |
| zebra_mbuna           | VPLNFILVNI | SFSGFIFVTF  | SVSQVFLASM  | RGYYFLGHTL  | CALESAVGSV | AGLVTA-WSL | AVLSFERYLV | [140] |
| pink_salmon           | QPLNYILVDV | SLAGFIFVTF  | SVSQVVFVSSA | RGYYFLGYTL  | CAMEACMGS  | AGLVSA-WSL | AVLAFERYVV | [140] |
| chum_salmon           | QPLNYILVNV | SLAGFIFVTF  | SVSQVVFVSSA | RGYYFLGYTL  | CAMEACMGS  | AGLVSA-WSL | AVLAFERYVV | [140] |
| coho_salmon           | QPLNYILVNV | SLAGFIFVTF  | SVSQVVFVSSA | GGYYFLGYTL  | CAMEACMGS  | AGLVSA-WSL | AVLAFERYVV | [140] |
| rainbow_trout         | QPLNYILVNV | SLAGFIFVTF  | SVSQVVFVSSA | RGYYFLGYTL  | CAMEACMGS  | AGLVSA-WSL | AVLAFERYVV | [140] |
| sockeye_salmon        | QPLNYILVNV | SLAGFIFVTF  | SVSQVVFVSSA | RGYYFLGYTL  | CAMEACMGS  | AGLVSA-WSL | AVLAFERYLV | [140] |
| chinook_salmon        | QPLNYILVNV | SLAGFIFVTF  | SVSQVVFVSSA | RGYYFLGYTL  | CAMEACMGS  | AGLVSA-WSL | AVLAFERYVV | [140] |
| Atlantic_salmon       | QPLNFILVNI | SLAGFIFVTF  | SVSQVVFVSSA | RGYYFLGYTL  | CAMEACMGS  | AGLVSA-WSL | AVLAFERYVV | [140] |
| smelt                 | QPLNYILVNI | SVGGFIFAVF  | SVSQVVFVSSL | RGYYFLGYTL  | CAMEACMGS  | AGLVTG-WSL | AVLAFERYVV | [140] |
| howler_monkey         | HPLNYVLVNV | SVGGFLLCIF  | SVPVVFVASC  | HGYFVFGHRV  | CALEGFLGTV | AGLVTG-WSL | AFLAFERYIV | [140] |
| cow                   | QPLNYILVNV | SLGGFIYCF   | SFVIVFITSC  | YGYFVFGHRV  | CALEAFLGCT | AGLVTG-WSL | AFLAFERYII | [140] |
| dog                   | QPLNYILVNV | SLGGFLYCIS  | VS-TVFIASC  | QGYFVFGHRV  | CALEAFLGST | AGLVTG-WSL | AFLAFERYIV | [140] |
| marmoset              | HPLNYVLVNV | SVGGFLLCIF  | SVPVVFVASC  | HGYFVFGHRV  | CALEGFLGTV | AGLVTG-WSL | AFLAFERYIV | [140] |
| capuchin_monkey       | HPLNYVLVNV | SVGGFLLCIF  | SVPVVFVASC  | HGYFVFGHRV  | CALEAFLGTV | AGLVTG-WSL | AFLAFERYIV | [140] |
| guinea_pig            | QPLNYILVNV | SLGGFLVCIF  | SVLAVFIASC  | YGYFVFGHRV  | CALEGFLGSV | AGMVTG-WSL | AFLAFERYLV | [140] |
| brown_lemur           | QPLNYILVNL | SFSGFLCCIF  | SVLPVFIASC  | RGYFVFGHRV  | CALEGFLGSA | AGLVIG-WSL | AFLAFERYVI | [140] |
| gorilla               | QPLNYILVNV | SFSGFLLCIF  | SVPVVFVASC  | NGYFVFGHRV  | CALEGFLGTV | AGLVTG-WSL | AFLAFERYIV | [140] |
| human                 | QPLNYILVNV | SFSGFLLCIF  | SVPVVFVASC  | NGYFVFGHRV  | CALEGFLGTV | AGLVTG-WSL | AFLAFERYIV | [140] |
| bandicoot             | QPLNYILVNI | SLAGFIYCF   | SFVTVFISSS  | QGYFVFGHRV  | CAMEAFLGSV | AGLVTG-WSL | AFLAFERFIV | [140] |
| African_elephant      | QPLNYILVNI | SLGGFLSCIF  | SFVIVFISSC  | KGYFVFGRYV  | CALEAFVGSV | AGLVTG-WSL | AFLAFERYIV | [140] |
| wallaby               | QPLNYILVNI | SLAGFIYCF   | SFVTVFISSS  | QGYFVFGHRV  | CAMEGFLGSV | AGLVTG-WSL | AFLAFERFIV | [140] |
| macaque               | QPLNYILVNV | SFSGFLLCIF  | SVPVVFVASC  | KGYFVFGHRV  | CAFEAFLGTV | AGLVTG-WSL | AFLAFERYIV | [140] |
| house_mouse           | QPLNYILVNV | SLGGFLVCIF  | SFVTVFIASC  | HGYFVFGHRV  | CALEAFLGSV | AGLVTG-WSL | AFLAFERYVV | [140] |
| talapoin              | QPLNYILVNV | SFSGFLLCIF  | SVPVVFVASC  | KGYFVFGHRV  | CGFEAFLGTV | AGLVTG-WSL | AFLAFERYIV | [140] |
| Djungarian_hamster    | QPLNYILVNI | SLGGFLFCIF  | SFVTVFIASC  | HGYFVFGHRV  | CALEAFLGSV | AGLVTG-WSL | AFLAFERYIV | [140] |
| chimpanzee            | QPLNYILVNV | SFSGFLLCIF  | SVPVVFVASC  | NGYFVFGHRV  | CALEGFLGTV | AGLVTG-WSL | AFLAFERYIV | [140] |
| Norway_rat            | QPLNYILVNV | SLGGFLVCIF  | SFVTVFIASC  | HGYFVFGHRV  | CALEAFLGSV | AGLVTG-WSL | AFLAFERYLV | [140] |
| squirrel_monkey       | HPLNYVLVNV | SVGGFLLCIF  | SVLPVVFVASC | NGYFVFGHRV  | CALEGFLGTV | AGLVTG-WSL | AFLAFERYIV | [140] |
| quokka                | QPLNYILVNI | SLAGFIYCF   | SFVTVFISSS  | QGYFVFGHRV  | CAMEGFLGSV | AGLVTG-WSL | AFLAFERFIV | [140] |
| dunnart               | QPLNYILVNI | SLAGFIFCVF  | SFVTVFVSSS  | QGYFVFGHRV  | CAMEGFLGSV | AGLVTG-WSL | AFLAFERFIV | [140] |
| pig                   | QPLNYILVNV | SLGGFIYCF   | SFVTVFIASC  | HGYFVFGHRV  | CAMEAFLGSA | AGLVTG-WSL | AFLAFERYII | [140] |
| western_tarsier       | QPLNYILVNV | SLGGFLLCIF  | SVLPVFIASC  | RGYFVFGHRV  | CALEGFLGSV | AGLVTG-WSL | AFLAFERYMV | [140] |
| Caribbean_manatee     | QPLNYILVNI | SLGGFLYCF   | SFVIVFITSC  | HGYFVFGRYV  | CALEAFLGAT | TGLVTG-WSL | AFLAFERYIV | [140] |
| green_anole           | QPLNYILVNI | SFAGFLFCTF  | SFVTVFMASS  | QGYFFFGRHV  | CAMEAFLGSV | AGLVTG-WSL | AFLAFERYIV | [140] |
| tokay_gecko           | QPLNYILVNI | SAAGFLFCV   | SVFTVFISSS  | QGYFVFGKHI  | CALEAFLGSL | AGLVTG-WSL | AFLAFERYIV | [140] |
| day_gecko             | QPLNYILVNI | SAAGFLFCTF  | SVFTVVFVSSA | QGYFVFGKHI  | CALEAFLGSL | AGLVTG-WSL | AFLAFERYIV | [140] |
| pigeon                | QPLNYILVNI | SFSGFISCF   | SVFTVVFVSSS | QGYFVFGKDM  | CALEAFVGT  | GGLVTG-WSL | AFLAFERYIV | [140] |
| yellow-crowned_bishop | QPLNYILVNI | SVSGLMCCVF  | CIFTVVFVASS | QGYFVFGKHM  | CAFEGFAGAT | GGLVTG-WSL | AFLAFERYIV | [140] |
| red_bishop            | QPLNYILVNI | SVSGLMCCVF  | CIFTVVFVASS | QGYFVFGKHM  | CAFEGFAGAT | GGLVTG-WSL | AFLAFERYIV | [140] |
| chicken               | QPLNYILVNI | SASGFVSCVL  | SFVVFVVASA  | RGYFVFGKRV  | CELEAFVGT  | GGLVTG-WSL | AFLAFERYIV | [140] |
| Siberian_rubythroat   | QPLNYILVNI | SVSGLMCCVF  | CIFTVVFVSSS | QGYFVFGKHV  | CAFEGFSGAT | VGLVTG-WSL | AFLAFERYIV | [140] |
| bluethroat            | QPLNYILVNI | SVSGLMCCVF  | CIFTVVFVSSS | QGYFVFGKHV  | CAFEGFSGAT | VGLVTG-WSL | AFLAFERYIV | [140] |
| budgerigar            | QPLNYILVNI | SFCGFLACII  | CIFTVVFVSSS | QGYFVFGKHV  | CAFEGFMGAT | AGLVTG-WSL | AFLAFERYIV | [140] |
| blue_tit              | QPLNYILVNI | SVSGLMCCVF  | CIFTVVFVSSS | QGYFVFGKHM  | CAFEGFAGAT | GGLVTG-WSL | AFLAFERYIV | [140] |
| great_tit             | QPLNYILVNI | SVSGLMCCVF  | CIFTVVFVSSS | QGYFVFGKHM  | CAFEGFAGAT | GGLVTG-WSL | AFLAFERYIV | [140] |
| marsh_tit             | QPLNYILVNI | SVSGLMCCVF  | CIFTVVFVSSS | QGYFVFGKHM  | CAFEGFAGAT | GGLVTG-WSL | AFLAFERYIV | [140] |
| Humboldts_penguin     | QPLNYILVNI | SFSGFISCF   | SVFTVVFVSSS | QGYFVFGKHM  | CALEGFVGT  | GGLVTG-WSL | AFLAFERYIV | [140] |
| common_canary         | QPLNYILVNI | SVSGLMCCVF  | CIFTVVFVASS | QGYFVFGKHM  | CRFEGFAGAT | GGMVTG-WSL | AFLAFERYIV | [140] |
| zebra_finch           | QPLNYILVNI | SVSGLMCCVF  | CIFTVFIASS  | QGYFVFGKHM  | CAFEGFAGAT | GGLVTG-WSL | AFLAFERYIV | [140] |
| tiger_salamander      | QPLNYILVNV | SLAGFTFCIF  | SVFTVVFVSSS | QGYFVFGKTI  | CELEAFLGSV | SGLVTG-WSL | AFLAFERYIV | [140] |
| firebelly_newt        | QPLNYILVNV | SLAGFTFCIF  | SFVTVVFVASS | QGYFVFGKFM  | CAMEAFLGSV | SGLVTG-WSL | AFLAFERYIV | [140] |
| American_bullfrog     | QPLNYILVNI | SVGGFLICIF  | SNFVVFINSW  | QGYFFFKAF   | CAIEAFVGT  | AGLVTG-WSL | AFLAFERYIV | [140] |
| African_clawed_frog   | QPLNYILVNI | TVGGFLMCIF  | SIFPVVFVSSS | QGYFFFGRIA  | CSIDAFVGT  | TGLVTG-WSL | AFLAFERYIV | [140] |
| pouched_lamprey       | ICKPFGNFRF | GSKHALVAVG  | LWMLGLSVA   | LPPFFGWSRY  | IPEGLQCSG  | PDWYTVGTYK | KSEYTYFLF  | [210] |
| goldfish              | ICKPFGSFKF | GQSQUALGAVA | LTWIIGIGCA  | TPPFFGWSRY  | IPEGLGTACG | PDWYTKNEEY | NTESYTYFLL | [210] |
| carp                  | ICKPFGSFKF | GQGQAMGAVA  | LTWVIGIGCA  | TPPFFGWSRY  | IPEGLGTSCG | PDWYTKNEEY | NCSYTYFLM  | [210] |
| Malawi_eye-biter      | ICKPFGAFKF | GSNHALAAVA  | FTWFMGIGCA  | CPPFFGWSRY  | IPEGLGCSG  | PDWYTHNEEY | NTSYTHFLM  | [210] |
| zebrafish             | ICKPFGSFKF | GQGQAVGAVV  | FTWIIGTACA  | TPPFFGWSRY  | IPEGLGTACG | PDWYTKNEEY | NCSYTYFLL  | [210] |
| Atlantic_halibut      | ICKPFGAFKF | GSNHAAGAVA  | FTWFMGISCA  | IPPPFFGWSRY | IPEGLGCSG  | PDWYTHNEEY | HCSSYTNFLM | [210] |
| Fuellerborns_cichlid  | ICKPFGAFKF | GSNHALAAVA  | FTWFMGIGCA  | CPPFFGWSRY  | IPEGLGCSG  | PDWYTHNEEY | NTSYTHFLM  | [210] |
| Nile_tilapia          | ICKPFGAFKF | GSNHALAAVA  | FTWFMGVGCA  | CPPFFGWSRY  | IPEGLGCSG  | PDWYTHNEEY | NTSYTYFLL  | [210] |
| killifish             | ICKPFGAFKF | GSSHAAGAVV  | FTWFMGVGCS  | SPPFFGWSRY  | IPEGLGCSG  | PDWYTNDEEL | GTTYMYFLL  | [210] |
| zebra_mbuna           | ICKPFGAFKF | GSNHALAAVA  | FTWFMGIGCA  | CPPFFGWSRY  | IPEGLGCSG  | PDWYTHNEEY | NTSYTHFLM  | [210] |
| pink_salmon           | ICKPFGTFKF | DNNQALAAVG  | FTWVMGIGCA  | TPPFFGWSRY  | IPEGLGCSG  | PDWYTNNEEY | HCASYTKFLI | [210] |
| chum_salmon           | ICKPFGTFKF | DNNQALAAVG  | FTWVMGIGCA  | TPPFFGWSRY  | IPEGLGCSG  | PDWYTNNEEY | HCASYTKFLI | [210] |
| coho_salmon           | ICKPFGTFKF | DNNQALAAVG  | FTWVMGIGCA  | TPPFFGWSRY  | IPEGLGCSG  | PDWYTNNEEY | HCASYTKFLI | [210] |
| rainbow_trout         | ICKPFGTFKF | DNNQALAAVG  | FTWVMGIGCA  | TPPFFGWSRY  | IPEGLGCSG  | PDWYTNNEEY | HCASYTKFLI | [210] |
| sockeye_salmon        | ICKPFGTFKF | DNNQALAAVG  | FTWVMGIGCA  | TPPFFGWSRY  | IPEGLGCSG  | PDWYTNNEEY | HCASYTKFLI | [210] |
| chinook_salmon        | ICKPFGTFKF | DNNQALAAVG  | FTWVMGIGCA  | TPPFFGWSRY  | IPEGLGCSG  | PDWYTNNEEY | HCASYTKFLI | [210] |

|                       |            |            |            |            |            |            |             |       |
|-----------------------|------------|------------|------------|------------|------------|------------|-------------|-------|
| Atlantic_salmon       | ICKPFGTFKF | DNNQALAAVA | FTWVMGIGCA | TPPFFGWSRY | IPEGLQCSCG | PDWYTNNEEY | HCASYTKFLI  | [210] |
| smelt                 | ICKPFGQFKF | GNTQALMAVG | FTWVMGVGCA | TPPFFGWSRY | IPEGLQCACG | PDWYTHNEEY | HCTSYTYFLM  | [210] |
| howler_monkey         | ICKPFGNFRF | SSKHALMVVL | TWTWIGIGVS | IPPPFGWSRF | IAEGLQCSCG | PDWYTVGTTY | RSEYYTWFLF  | [210] |
| cow                   | ICKPFGNFRF | SSKHALMVVV | ATWTIGIGVS | IPPPFGWSRF | VPEGLQCSCG | PDWYTVGTTY | YSEYYTWFLF  | [210] |
| dog                   | ICKPFGNFRF | SSKHALMVVL | ATWTIGIGVS | IPPPFGWSRF | IPEGLQCSCG | PDWYTVGTTY | RSEYYTWFLF  | [210] |
| marmoset              | ICKPFGNFRF | SSKHALMVVL | TWTWIGIGVS | IPPPFGWSRY | IAEGLQCSCG | PDWYTVGTTY | RSEYYTWFLF  | [210] |
| capuchin_monkey       | ICKPFGNFRF | SSKHALMVVL | TWTWIGIGVS | IPPPFGWSRF | IAEGLQCSCG | PDWYTVGTTY | RSEYYTWFLF  | [210] |
| guinea_pig            | ICKPFGNFRF | SSKHALIVVL | ATWVIGIGVS | IPPPFGWSRY | MPEGLQCSCG | PDWYTVGTTY | RSEYFAWFLF  | [210] |
| brown_lemur           | ICKPFGNFRF | SSKHALMVVL | ATWTIGIGVS | IPPPFGWS-F | IPEGLQCSCG | PDWYTVGTTY | RSEYYTWFLF  | [210] |
| gorilla               | ICKPFGNFRF | SSKHALTVVL | ATWTIGIGVS | IPPPFGWSRF | IPEGLQCSCG | PDWYTVGTTY | RSESYTWFLF  | [210] |
| human                 | ICKPFGNFRF | SSKHALTVVL | ATWTIGIGVS | IPPPFGWSRF | IPEGLQCSCG | PDWYTVGTTY | RSEYYTWFLF  | [210] |
| bandicoot             | ICKPFGNFRF | HSKHAMMVVL | ATWVIGIGVS | IPPPFGWSRF | IPEGLQCSCG | PDWYTVGTTY | RSEYYTWFLF  | [210] |
| African_elephant      | ICKPFGNFRF | SSKHALMVVL | ATWTIGIGVS | IPPPFGWSRF | LPEGLQCSCG | PDWYTVGTTY | RSEYYTWFLF  | [210] |
| wallaby               | ICKPFGNFRF | NSKHSMVVVL | ATWVIGIGVS | IPPPFGWSRY | IPEGLQCSCG | PDWYTVGTTY | RSEYYTWFLF  | [210] |
| macaque               | ICKPFGNFRF | SSKHALTVVL | ATWTIGIGVS | IPPPFGWSRF | IPEGLQCSCG | PDWYTVGTTY | RSEYYTWFLF  | [210] |
| house_mouse           | ICKPFGSIRF | NSKHALMVVL | ATWTIGIGVS | IPPPFGWSRF | IPEGLQCSCG | PDWYTVGTTY | RSEYYTWFLF  | [210] |
| talapoin              | ICKPFGNFRF | SSKHALTVVL | ATWVIGIGVS | IPPPFGWSRF | IPEGLQCSCG | PDWYTVGTTY | RSESYTWFLF  | [210] |
| Djungarian_hamster    | ICKPFGNFRF | SSKHALIVVL | VTWVIGIGVS | IPPPFGWSRF | IPEGLQCSCG | PDWYTVGTTY | RSESYTWFLF  | [210] |
| chimpanzee            | ICKPFGNFRF | SSKHALTVVL | ATWTIGIGVS | IPPPFGWSRF | IPEGLQCSCG | PDWYTVGTTY | RSEYYTWFLF  | [210] |
| Norway_rat            | ICKPFGNFRF | NSKHALTVVL | ITWTIGIGVS | IPPPFGWSRF | IPEGLQCSCG | PDWYTVGTTY | RSEHYTWFLF  | [210] |
| squirrel_monkey       | ICKPFGNFRF | SSKHALMVVL | TWTWIGIGVS | IPPPFGWSRY | IAEGLQCSCG | PDWYTVGTTY | RSEYYTWFLF  | [210] |
| quokka                | ICKPFGNFRF | NSKHSMVVVL | ATWVIGIGVS | IPPPFGWSRY | IPEGLQCSCG | PDWYTVGTTY | HSEYYTWFLF  | [210] |
| dunnart               | ICKPFGNFRF | NSKHAMMVVL | ATWVIGIGVS | IPPPFGWSRY | IPEGLQCSCG | PDWYTVGTTY | RSEYYTWFLF  | [210] |
| pig                   | ICKPFGNFRF | SSKHALIVVL | ATWVIGIGVS | IPPPFGWSRF | LPEGLQCSCG | PDWYTVGTTY | YSEYYTWFLF  | [210] |
| western_tarsier       | ICKPFGNFRF | SPKHALMVVL | ATWTIGIGVS | VPPFFGWSRF | IPEGLQCSCG | PDWYTVGTTY | HSEYYTWFLF  | [210] |
| Caribbean_manatee     | ICKPFGNFRF | SSKHALMVVL | ATWVIGIGVS | IPPPFGWSRF | MPEGLQCSCG | PDWYTVGTTY | HSEHYTWFLF  | [210] |
| green_anole           | ICKPFGNFRF | NSKHALLVVA | ATWVIGIGVS | IPPPFGWSRY | IPEGLQCSCG | PDWYTVGTTY | KSEYYTWFLF  | [210] |
| tokay_gecko           | ICKPFGNFRF | SAKHASLVVA | ATWVIGIGVS | IPPPFGWSRF | IPEGLQCSCG | PDWYTVGTTY | RSEYYTWFLF  | [210] |
| day_gecko             | ICKPFGNFRF | NAKHASLVVA | ATWVIGIGVS | VPPFFGWSRY | IPEGLQCSCG | PDWYTVGTTY | RSEYYTWFLF  | [210] |
| pigeon                | ICKPFGNFRF | NSKHALMAVV | ATWVIGLVA  | LPPWFWSRY  | VPEGLQCSCG | PDWYTVGTTY | KSEYYTWFLF  | [210] |
| yellow-crowned_bishop | ICKPFGNFRF | NSRHALLVVA | ATWVIGVVA  | IPPPFGWSRY | IPEGLQCSCG | PDWYTVGTTY | KSEYYTWFLF  | [210] |
| red_bishop            | ICKPFGNFRF | NSRHALLVVA | ATWVIGVVA  | IPPPFGWSRY | IPEGLQCSCG | PDWYTVGTTY | RSEYYTWFLF  | [210] |
| chicken               | ICKPFGNFRF | SSRHALLVVV | ATWVIGVVA  | LPPFFGWSRY | MPEGLQCSCG | PDWYTVGTTY | RSEYYTWFLF  | [210] |
| Siberian_rubythroat   | ICKPFGNFRF | NSRHALLVVA | ATWVIGVVA  | IPPPFGWSRY | IPEGLQCSCG | PDWYTVGTTY | KSEYYTWFLF  | [210] |
| bluethroat            | ICKPFGNFRF | NSRHALLVVA | ATWVIGVVA  | IPPPFGWSRY | IPEGLQCSCG | PDWYTVGTTY | KSEYYTWFLF  | [210] |
| budgerigar            | ICKPFGNFRF | TAKHALVVVV | ATWVIGVVA  | IPPPFGWSRY | VPEGLQCSCG | PDWYTVGTTY | RSEYYTWFLF  | [210] |
| blue_tit              | ICKPFGNFRF | NSRHALLVVA | ATWVIGVVA  | VPPFFGWSRY | VPEGLQCSCG | PDWYTVGTTY | KSEYYTWFLF  | [210] |
| great_tit             | ICKPFGNFRF | NSRHALLVVA | ATWVIGVVA  | VPPFFGWSRY | VPEGLQCSCG | PDWYTVGTTY | KSEYYTWFLF  | [210] |
| marsh_tit             | ICKPFGNFRF | NSRHALLVVA | ATWVIGVVA  | VPPFFGWSRY | VPEGLQCSCG | PDWYTVGTTY | KSEYYTWFLF  | [210] |
| Humboldts_penguin     | ICKPFGNFRF | SSKHAVMVVV | ATWVIGVVA  | IPPPFGWSRY | IPEGLQCSCG | PDWYTVGTTY | RSEYYTWFLF  | [210] |
| common_canary         | ICKPFGNFRF | NSRHALLVVA | ATWVIGVVA  | IPPPFGWSRY | IPEGLQCSCG | PDWYTVGTTY | KSEYYTWFLF  | [210] |
| zebra_finch           | ICKPFGNFRF | NSRHALLVVA | ATWVIGVVA  | IPPPFGWSRY | IPEGLQCSCG | PDWYTVGTTY | KSEYYTWFLF  | [210] |
| tiger_salamander      | ICKPMGSFRF | SSKHATMVVL | ATWVIGSVS  | IGPLVGSRY  | IPEGLQCSCG | PDWYTVGTTY | NSEYTWFLF   | [210] |
| firebelly_newt        | ICKPMGNFRF | ASKHALMVVL | TWVIGVVA   | IGPLVGSRY  | IPEGLQCSCG | PDWYTVGTTY | RSEYYTWFLF  | [210] |
| American_bullfrog     | ICKPMGTFTF | TSKHALAVVL | TWVIGVVA   | VPPFFGWSRY | IPEGLQCSCG | PDWYTVGTTY | HSEYYTWFLF  | [210] |
| African_clawed_frog   | ICKPMGNFNF | SSSHALAVVI | CTWVIGVVS  | VPPFLGWSRY | MPEGLQCSCG | PDWYTVGTTY | RSEYYTWFLF  | [210] |
|                       |            |            |            |            |            |            |             |       |
| pouched_lamprey       | VFCFVPLSI  | IIFSYSLLG  | TLRA--VAAQ | QESASTQKA  | EREVSRMIV  | MVASFCTCYV | PYAALAVYMV  | [280] |
| goldfish              | VSCFMPIMI  | IIFSYSQLL  | ALRA--VAAQ | QESASTQKA  | EKEVSRMVV  | MVGSFVVCYV | PYAITALYFS  | [280] |
| carp                  | VTCFILPMMI | IIFSYSQLL  | ALRA--VAAQ | QESASTQKA  | EKEVSRMVV  | MVGSYIVCYV | PYAIAALYFG  | [280] |
| Malawi_eye-biter      | VTCFIPLSI  | IIFCYSQLL  | ALRA--VAAQ | QESASTQKA  | EKEVSRMIV  | MVGSFVTCYV | PYALAALYFA  | [280] |
| zebrafish             | ITCFMMPMTI | IIFSYSQLL  | ALRA--VAAQ | QESASTQKA  | EREVSRMVV  | MVGSFVLCYA | PYAVTAMYFA  | [280] |
| Atlantic_halibut      | VTCFILPLTI | IIFSYSQLL  | ALRA--VAAQ | QESASTQKA  | EKEVSRMIV  | MVGSFVTCYV | PYALAALYFA  | [280] |
| Fuellerborns_cichlid  | VTCFIPLSI  | IIFCYSQLL  | ALRA--VAAQ | QESASTQKA  | EKEVSRMIV  | MVGSFVTCYV | PYALAALYFA  | [280] |
| Nile_tilapia          | ITCFIFPLTI | IIFCYSQLL  | ALRA--VAAQ | QESASTQKA  | EKEVSRMIV  | MVGSFVTCYV | PYALAALYFA  | [280] |
| killifish             | ITCFMPLSI  | IIFSYSQLL  | ALRA--VAAQ | QESASTQKA  | EKEVSRMIV  | MVGSFVTCYA | PYALTLGLWFA | [280] |
| zebra_mbuna           | VTCFIPLSI  | IIFCYSQLL  | ALRA--VAAQ | QESASTQKA  | EKEVSRMIV  | MVGSFVTCYV | PYALAALYFA  | [280] |
| pink_salmon           | VTCFLMPMSI | IIFSYSQLL  | ALRA--VAAA | QESASTQKA  | EKEVSRMIV  | MVCSFILCYV | PYALAGLYFA  | [280] |
| chum_salmon           | VTCFLMPMSI | IIFSYSQLL  | ALRA--VAAA | QESASTQKA  | EKEVSRMIV  | MVCSFILCYV | PYALAGLYFA  | [280] |
| coho_salmon           | VTCFLMPMSI | IIFSYSQLL  | ALRA--VAAA | QESASTQKA  | EKEVSRMIV  | MVCSFILCYV | PYALAGLYFA  | [280] |
| rainbow_trout         | VTCFLMPMSI | IIFSYSQLL  | ALRA--VAAA | QESASTQKA  | EKEVSRMIV  | MVCSFILCYV | PYALAGLYFA  | [280] |
| sockeye_salmon        | VTCFLMPMSI | IIFSYSQLL  | ALRA--VAAA | QESASTQKA  | EKEVSRMIV  | MVCSFILCYV | PYALAGLYFA  | [280] |
| chinook_salmon        | VTCFLMPMSI | IIFSYSQLL  | ALRA--VAAA | QESASTQKA  | EKEVSRMIV  | MVCSFILCYV | PYALAGLYFA  | [280] |
| Atlantlc_salmon       | VTCFLMPMSI | IIFSYSQLL  | ALRA--VAAA | QESASTQKA  | EKEVSRMIV  | MVCSFILCYV | PYALAGLYFA  | [280] |
| smelt                 | VTCFMMPLTI | IIFSYSQLL  | ALRA--VAAQ | QESASTQKA  | EKEVSRMIV  | MVGSFVVCYA | PYAITALYFG  | [280] |
| howler_monkey         | IFCFIVPLSL | ICFSYAQLL  | ALKA--VAAQ | QESASTQKA  | EREVSRMVV  | MVGSFVVCYV | PYAALAMYMV  | [280] |
| cow                   | IFCFIVPLSL | ICFSYAQLL  | ALKA--VAAQ | QESASTQKA  | EREVSRMVV  | MVGSFVVCYV | PYAALAMYMV  | [280] |
| dog                   | IFCFIVPLSL | ICFSYAQLL  | ALKA--VAAQ | QESASTQKA  | EREVSRMVV  | MVGSFVVCYV | PYAALAMYMV  | [280] |
| marmoset              | IFCFIVPLAL | ICFSYAQLL  | ALKA--VAAQ | QESASTQKA  | EREVSRMVV  | MVGSFVVCYV | PYAALAMYMV  | [280] |
| capuchin_monkey       | IFCFIVPLSL | ICFSYAQLL  | ALKA--VAAH | QESASTQKA  | EREVSRMVV  | MVGSFVVCYV | PYAALAMYMV  | [280] |
| guinea_pig            | IFCFIVPLSL | ICFSYAQLL  | TLRT--VAAQ | QESASTQKA  | EREVSRMVV  | MVGSFVVCYV | PYAALAMYMV  | [280] |

|                       |            |            |            |            |            |            |             |       |
|-----------------------|------------|------------|------------|------------|------------|------------|-------------|-------|
| brown_lemur           | IFCFIVPLSL | ICFSYSQLLR | ALRA--VAAQ | QGESATTQKA | EREVSRMVVV | MVGSFCLCYV | PYAALAMYIV  | [280] |
| gorilla               | IFCFIVPLSL | ICFSYQQLLR | ALKA--VAAQ | QGESATTQKA | EREVSRMVVV | MVGSFVCYV  | PYAAFAMYV   | [280] |
| human                 | IFCFIVPLSL | ICFSYQQLLR | ALKA--VAAQ | QGESATTQKA | EREVSRMVVV | MVGSFVCYV  | PYAAFAMYV   | [280] |
| bandicoot             | IFCFIPLSL  | ICFSYSQLLR | ALRT--VAAQ | QGESATTQKA | EREVSRMVVV | MVGSFCLCYV | PYAALAMYV   | [280] |
| African_elephant      | IFCFIVPLSL | ICFSYSQLLG | ALRA--VAAQ | QGESATTQKA | EREVSRMVVV | MVGSFCLCYV | PYAALAMYV   | [280] |
| wallaby               | ILCFIMPLSL | ICFSYSQLLG | ALRA--VAAQ | QGESATTQKA | EREVSRMVVV | MVGSFCLCYV | PYAALAMYV   | [280] |
| macaque               | IFCFIVPLSL | ICFSYQQLLR | ALKA--VAAQ | QGESATTQKA | EREVSRMVVV | MVGSFVCYV  | PYAAFAMYV   | [280] |
| house_mouse           | IFCFIPLSL  | ICFSYSQLLR | TLRA--VAAQ | QGESATTQKA | EREVSHMVVV | MVGSFCLCYV | PYAALAMYV   | [280] |
| talapoin              | IFCFIVPLSL | ICFSYQQLLR | ALKA--VAAQ | QGESATTQKA | EREVSRMVVV | MVGSFVCYV  | PYAAFAMYV   | [280] |
| Djungarian_hamster    | LFCFIVPLSL | ICFSYSQLLR | TLRA--VAAQ | QGESATTQKA | EREVTLMVVV | MVGSFVCYV  | PYAALAMYV   | [280] |
| chimpanzee            | IFCFIVPLSL | ICFSYQQLLR | ALKA--VAAQ | QGESATTQKA | EREVSRMVVV | MVGSFVCYV  | PYAAFAMYV   | [280] |
| Norway_rat            | IFCFIPLSL  | ICFSYQQLLR | TLRA--VAAQ | QGESATTQKA | EREVSHMVVV | MVGSFCLCYV | PYAALAMYV   | [280] |
| squirrel_monkey       | IFCFIVPLSL | ICFSYAQLLR | ALKA--VAAQ | QGESATTQKA | EREVSRMVVV | MVGSFVCYV  | PYAALAMYV   | [280] |
| quokka                | ILCFIMPLSL | ICFSYSQLLG | ALRA--VAAQ | QGESATTQKA | EREVSRMVVV | MVGSFCLCYV | PYAALAMYV   | [280] |
| dunnart               | IFCFIVPLSL | ICFSYSQLLG | ALRA--VAAQ | QGESATTQKA | EREVSRMVVV | MVGSFCLCYV | PYAAMAMYV   | [280] |
| pig                   | IFCFIVPLAL | ICFSYSQLLR | ALRA--VAAQ | QGESATTQKA | EREVSHMVVV | MVGSFVCYV  | PYAALAMYV   | [280] |
| western_tarsier       | IFCFIVPLSL | ICFSYAQLLR | ALRA--VAAQ | QGESATTQKA | EREVSRMVVV | MVGSFCLCYV | PYAALAMYV   | [280] |
| Caribbean_manatee     | IFCFIVPLSL | ICLLLLPAAG | ALRA--VAAQ | QGESATTQKA | EREVSRMVVV | MVGSFCLCYV | PYAALAMYV   | [280] |
| green_anole           | IFCFIVPLTL | IIFSYSQLLG | ALRA--VAAQ | QGESATTQKA | EREVSRMVVV | MVGSFCLCYV | PYAALAMYV   | [280] |
| tokay_gecko           | VLCFIVPLSI | IIFSYSQLLS | ALRA--VAAQ | QGESATTQKA | EREVSRMVVV | MVGSFCLCYV | PYAALAMYV   | [280] |
| day_gecko             | IFCFMVPLTI | IIFSYSQLLS | ALRA--VAAQ | QGESATTQKA | EREVSRMVVV | MVGSFCLCYV | PYAALAMYV   | [280] |
| pigeon                | IFCFIVPLSL | IIFSYSQLLS | ALRA--VAAQ | QGESATTQKA | EREVSRMVVV | MVGSFCLCYV | PYAALAMYV   | [280] |
| yellow-crowned_bishop | IFCFIVPLSL | IIFSYSQLLS | ALRA--VAAQ | QGESATTQKA | EREVSRMVVV | MVGSFCLCYV | PYAALAMYV   | [280] |
| red_bishop            | IFCFIVPLSL | IIFSYSQLLS | ALRA--VAAQ | QGESATTQKA | EREVSRMVVV | MVGSFCLCYV | PYAALAMYV   | [280] |
| chicken               | IFCFIVPLSL | IIFSYSQLLS | ALRA--VAAQ | QGESATTQKA | EREVSRMVVV | MVGSFCLCYV | PYAALAMYV   | [280] |
| Siberian_rubythroat   | IFCFIVPLSL | IIFSYSQLLS | ALRA--VAAQ | QGESATTQKA | EREVSRMVVV | MVGSFCLCYV | PYAALAMYV   | [280] |
| bluethroat            | IFCFIVPLSL | IIFSYSQLLS | ALRA--VAAQ | QGESATTQKA | EREVSRMVVV | MVGSFCLCYV | PYAALAMYV   | [280] |
| budgerigar            | IFCFIVPLSL | IIFSYSQLLS | ALRA--VAAQ | QGESATTQKA | EREVSRMVVV | MVGSFCLCYV | PYAALAMYV   | [280] |
| blue_tit              | IFCFIVPLSL | IIFSYSQLLS | ALRA--VAAQ | QGESATTQKA | EREVSRMVVV | MVGSFCLCYV | PYAALAMYV   | [280] |
| great_tit             | IFCFIVPLSL | IIFSYSQLLS | ALRA--VAAQ | QGESATTQKA | EREVSRMVVV | MVGSFCLCYV | PYAALAMYV   | [280] |
| marsh_tit             | IFCFIVPLSL | IIFSYSQLLS | ALRA--VAAQ | QGESATTQKA | EREVSRMVVV | MVGSFCLCYV | PYAALAMYV   | [280] |
| Humboldt's_penguin    | IFCFIVPLSL | IIFSYSQLLS | ALRA--VAAQ | QGESATTQKA | EREVSRMVVV | MVGSFCLCYV | PYAALAMYV   | [280] |
| common_canary         | IFCFIPLSL  | IIFSYSQLLS | PCGA--VAAQ | QGESATTQKA | EREVSRMVVV | MVGSFCLCYV | PYAALAMYV   | [280] |
| zebra_finch           | IFCFIVPLSL | IIFSYSQLLS | ALRA--VAAQ | QGESATTQKA | EREVSRMVVV | MVGSFCLCYV | PYAALAMYV   | [280] |
| tiger_salamander      | IFCFIPLSL  | ICFCYAQLLG | ALRA--VAAQ | QGESATTQKA | EREVTRMVVV | MVGSFCLCYV | PYAAMAMYV   | [280] |
| firebelly_newt        | IFCFIPLSL  | ICFCYAQLLG | ALRA--VAAQ | QGESATTQKA | EREVTRMVVV | MVGSFCLCYV | PYAAMAMYV   | [280] |
| American_bullfrog     | VFCFIPLTL  | ICYSYARLLG | ALRA--VAAQ | QGESASTQKA | EKEVSRMVVV | MVGSFCLCYV | PYAAMAMYI   | [280] |
| African_clawed_frog   | IFCFVIPLSL | ICFSYGRLLG | ALRA--VAAQ | QGESASTQKA | EREVSRMVVV | MVGSFCLCYV | PYAAMAMYV   | [280] |
|                       |            |            |            |            |            |            |             |       |
| pouched_lamprey       | TNRDHNIDL  | FVTPAFFSK  | ASCYVNPDIY | SFMNKQFRAC | ILETVCGKPI | TDESETSSSR | TEVSSVSTTQ  | [350] |
| goldfish              | YAEDSNKDYR | LVAIPSLFSK | SSCVYNPLIY | AFMKNQFNAC | IMETVFGKKI | DESSEVSSKT | ETSSVSA*--  | [350] |
| carp                  | YAEDTNKDYR | LVAIPALFSK | SSCVYNPLIY | AFMKNQFNAC | IMETVFGKKI | DESSEVSSKT | ETSSVSA*--  | [350] |
| Malawi_eye-biter      | YSTDENKDYR | LVTIPAFFSK | SACVYNPLIY | VFMNKQFNAC | IMEMVFGKTM | DESSEVSTKT | EVSTAS*---  | [350] |
| zebrafish             | NSDENKDYR  | LVAIPAFFSK | SSCVYNPLIY | AFMKNQFNAC | IMETVFGKKI | DESSEVSSKT | ETSSVSA*--  | [350] |
| Atlantic_halibut      | HSSDTNKDYR | LVTIPAFFSK | SSCVYNPLIY | VFMNKQFNAC | IMETVFGKKI | DESSEVSSKT | EASSVSTVN*  | [350] |
| Fuellerborns_cichlid  | YSTDENKDYR | LVTIPAFFSK | SACVYNPLIY | VFMNKQFNAC | IMEMVFGKTM | DESSEVSTKT | EVSTAS*---  | [350] |
| Nile_tilapia          | YSTDENKDYR | LVTIPAFFSK | SSCVYNPLIY | VFMNKQFNAC | IMEMVFGKTM | DESSEVSTKT | EVSTAS*---  | [350] |
| killifish             | NSPEVNDYR  | LVTIPAFFSK | SSCVYNPLIY | AFMKNQFNAC | IMEMVFGKTM | EEASEVSTKT | EVSTAS*---  | [350] |
| zebra_mbuna           | YSTDENKDYR | LVTIPAFFSK | SACVYNPLIY | VFMNKQFNAC | IMEMVFGKTM | DESSEVSTKT | EVSTAS*---  | [350] |
| pink_salmon           | YTTSENKDYR | LVTIPAFFSK | SSCVYNPLIY | AFMKNQFNAC | IMETVFGKQI | EETSVSASKT | EVSTA*----  | [350] |
| chum_salmon           | YTTSENKDYR | LVTIPAFFSK | SSCVYNPLIY | AFMKNQFNAC | IMETVFGKQI | EETSVSASKT | EVSTA*----  | [350] |
| coho_salmon           | YTTSENKDYR | LVTIPAFFSK | SSCVYNPLIY | AFMKNQFNAC | IMETVFGKQI | EETSVSASKT | EVSTA*----  | [350] |
| rainbow_trout         | YTTSENKDYR | LVTIPAFFSK | SSCVYNPLIY | AFMKNQFNAC | IMETVFGKQI | EETSVSASKT | EVSTA*----  | [350] |
| sockeye_salmon        | YTTSENKDYR | LVTIPAFFSK | SSCVYNPLIY | AFMKNQFNAC | IMETVFGKQI | EETSVSASKT | EVSTA*----  | [350] |
| chinook_salmon        | YTTSEVKDYR | LVTIPAFFSK | SSCVYNPLIY | AFMKNQFNAC | IMETVFGKQI | EETSVSASKT | EVSTA*----  | [350] |
| Atlantic_salmon       | YTTSENKDYR | LVTIPAFFSK | SSCVYNPLIY | AFMKNQFNAC | IMETVFGKQI | EETSVSASKT | EVSTA*----  | [350] |
| smelt                 | FSTNENKDYR | MVTIPAMFSK | SSCVYNPLIY | AFMKNQFNAC | IMETVFGKKI | DESSEVSSKT | ETSSVSTA*-- | [350] |
| howler_monkey         | NNRNHGLDLR | LVTIPAFFSK | SSCIYNPIIY | CFMKNQFRAC | IMEMVCGKAM | TDESDLSQQ  | KTEVSTVSSS  | [350] |
| cow                   | NNRNHGLDLR | LVTIPAFFSK | SACVYNPIIY | CFMKNQFRAC | IMEMVCGKPM | TDESELSSQ  | KTEVSTVSSS  | [350] |
| dog                   | NNRNHGLDLR | LVTIPAFFSK | SACVYNPIIY | CFMKNQFRAC | IMEMVCGKSM | TDESEMSSQ  | KTEVSTVSSS  | [350] |
| marmoset              | NNRNHGLDLR | LVTIPAFFSK | SSCIYNPIIY | CFMKNQFRAC | IMEMVCGKAM | TDESDISSQ  | KTEVSTVSPS  | [350] |
| capuchin_monkey       | NNRNHGLDLR | LVTIPAFFSK | SSCIYNPIIY | SFMNKQFRAC | IMEMVCGKAM | TDESDISSQ  | KTEVSTVSTS  | [350] |
| guinea_pig            | NNRNHGLDLR | LVTIPAFFSK | SSCIYNPIIY | CFMKNQFRAC | IMELVCRKPM | ADESDMTSQ  | KTEVSAVSSS  | [350] |
| brown_lemur           | NNRNHGLDLR | LVTIPAFFSK | SACVYNPIIY | CFMKNQFRAC | IMEMVCGKAM | TDESNTSSQ  | KTEVSTFSSS  | [350] |
| gorilla               | NNRNHGLDLR | LVTIPAFFSK | SSCIYNPIIY | CFMKNQFRAC | IMKMVCGKAM | TDESNTSSQ  | KTEVSTVSSS  | [350] |
| human                 | NNRNHGLDLR | LVTIPAFFSK | SACVYNPIIY | CFMKNQFRAC | IMKMVCGKAM | TDESNTSSQ  | KTEVSTVSSS  | [350] |
| bandicoot             | NNRNHGLDLR | LVTIPAFFSK | SACVYNPIIY | CFMKNQFRAC | IMEMICRCPM | TDESNTSSQ  | KTEVSTVSSS  | [350] |
| African_elephant      | NNRNHGLDLR | LVTIPAFFSK | SACVYNPIIY | CFMKNQFRAC | IMEMVCGKSV | ADESNTSSQ  | KTEVSTVSSS  | [350] |
| wallaby               | NNRNHGLDLR | LVTIPAFFSK | SSCVYNPIIY | CFMKNQFRAC | IMEMVCRKPM | TDESNTSSQ  | KTEVSTVSSS  | [350] |
| macaque               | NNRNHGLDLR | LVTIPAFFSK | SACVYNPIIY | CFMKNQFRAC | IMKMVCGKAM | TDESNTSSQ  | KTEVSTVSSS  | [350] |
| house_mouse           | NNRNHGLDLR | LVTIPAFFSK | SSCVYNPIIY | CFMKNQFRAC | IEMVCRKPM  | ADESNTSSQ  | KTEVSTVSSS  | [350] |



|                       |              |         |
|-----------------------|--------------|---------|
| western_tarsier       | QVSPN*----   | - [361] |
| Caribbean_manatee     | -----        | - [361] |
| green_anole           | SQVSPS*----  | - [361] |
| tokay_gecko           | SQVGPS*----  | - [361] |
| day_gecko             | SQVSPS*----  | - [361] |
| pigeon                | SQVSPS*----  | - [361] |
| yellow-crowned_bishop | -----        | - [361] |
| red_bishop            | -----        | - [361] |
| chicken               | SQVGPT*----  | - [361] |
| Siberian_rubythroat   | -----        | - [361] |
| bluethroat            | -----        | - [361] |
| budgerigar            | SQVSPS*----  | - [361] |
| blue_tit              | S?-----      | - [361] |
| great_tit             | -----        | - [361] |
| marsh_tit             | -----        | - [361] |
| Humboldts_penguin     | S-----       | - [361] |
| common_canary         | SQVGPGQPRM * | [361]   |
| zebra_finch           | SQVGPS*----  | - [361] |
| tiger_salamander      | SQVSPS*----  | - [361] |
| firebelly_newt        | SQVSPN*----  | - [361] |
| American_bullfrog     | SQVSPSAS*-   | - [361] |
| African_clawed_frog   | SQVSPA*----  | - [361] |
